# Supplementary material for: Sustainable production of formic acid by electrolytic reduction of gaseous carbon dioxide
Source: Royal Society of Chemistry journal article supplement (doi:10.1039/c4ta03893b), 2014-08-29
Supplement: c4ta03893b1.pdf [file c4ta03893b1.pdf]

## Supplementary Information

### Sustainable production of HCOOH *via* an electrolytic reduction of gas-phase CO<sub>2</sub>

Seunghwa Lee, HyungKuk Ju, Revocatus Machunda, Sunghyun Uhm, Jae Kwang Lee,  
Hye Jin Lee and Jaeyoung Lee

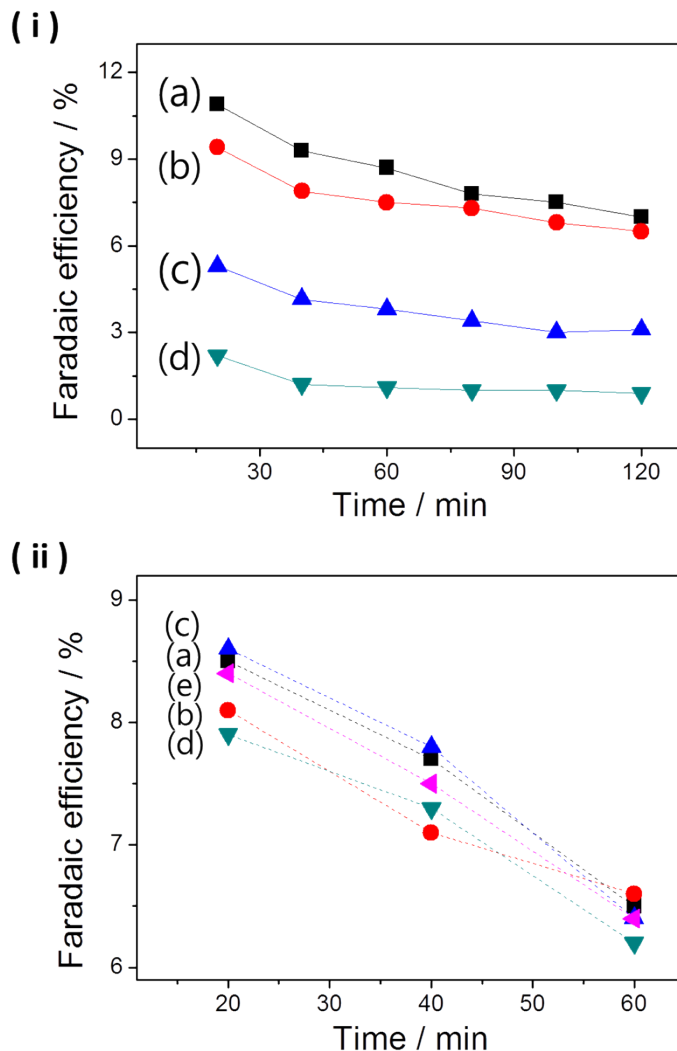

**Figure S1.** (i) Faradaic efficiencies depending on the various operating temperatures : (a) 30°C (b) 50°C (c) 70°C (d) and 100°C. (ii) Faradaic efficiencies depending on the various hydrogen gas flow rates : (a) 20 ml min<sup>-1</sup> (b) 40 ml min<sup>-1</sup> (c) 60 ml min<sup>-1</sup> (d) 80 ml min<sup>-1</sup> and (e) 100 ml min<sup>-1</sup>. Ambient operating room temperature (30°C) showed the higher faradaic efficiency and was maintained during long-term CO<sub>2</sub> electroreduction. There was no relationship between hydrogen supply and mass transfer limitation relative to the catalytic activity.

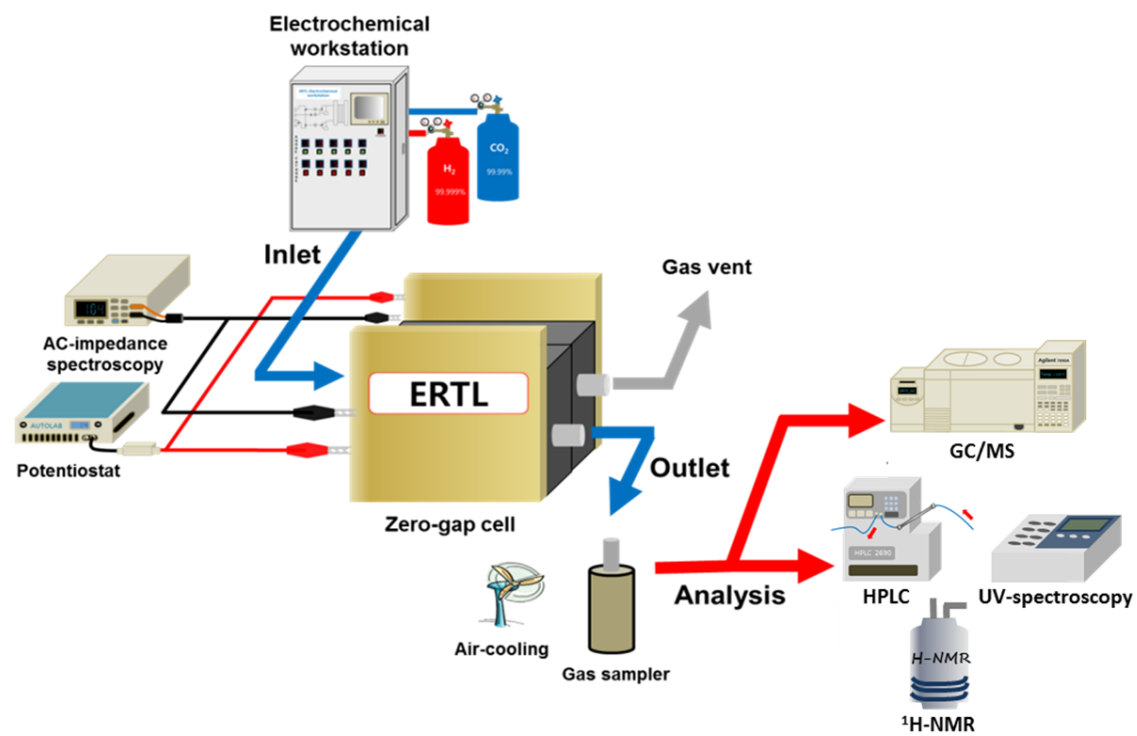

**Figure S2.** Schematic diagram of the configuration for CO<sub>2</sub> electroreduction system including the analysis equipment.

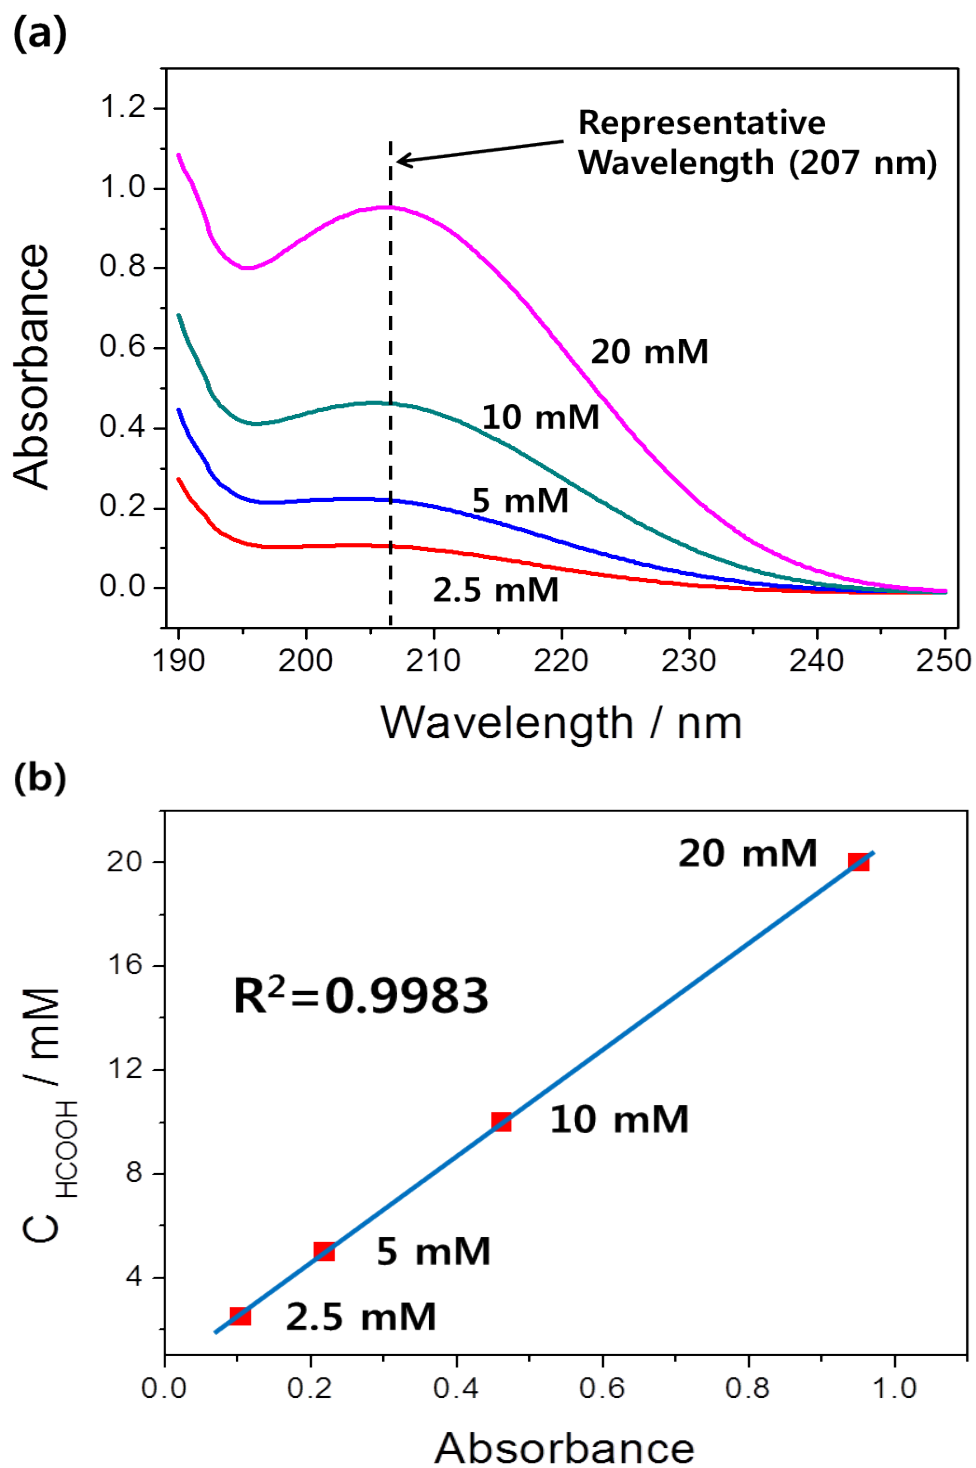

**Figure S3.** Quantification procedure of formic acid by UV-spectroscopy, UV-Vis absorption spectra for different concentrations of commercial formic acid (a) and calibration curve from (a) for measurement of HCOOH generated by CO<sub>2</sub> electroreduction (b).

(i)

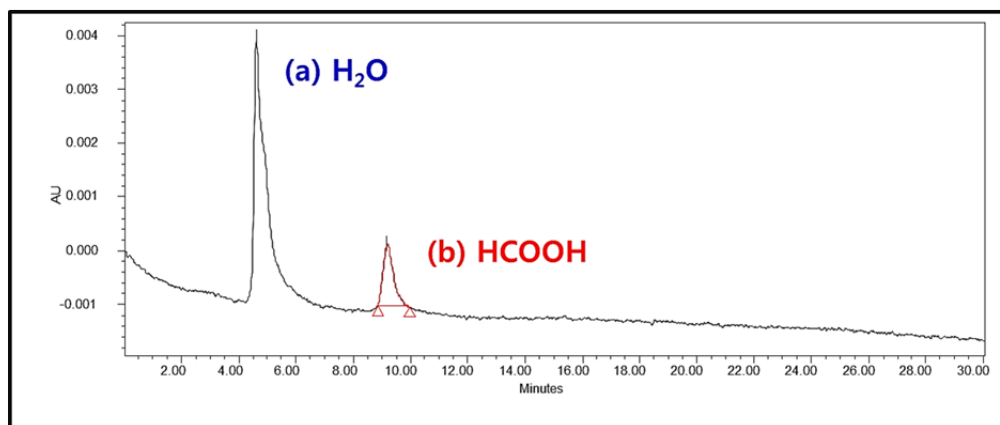

(ii)

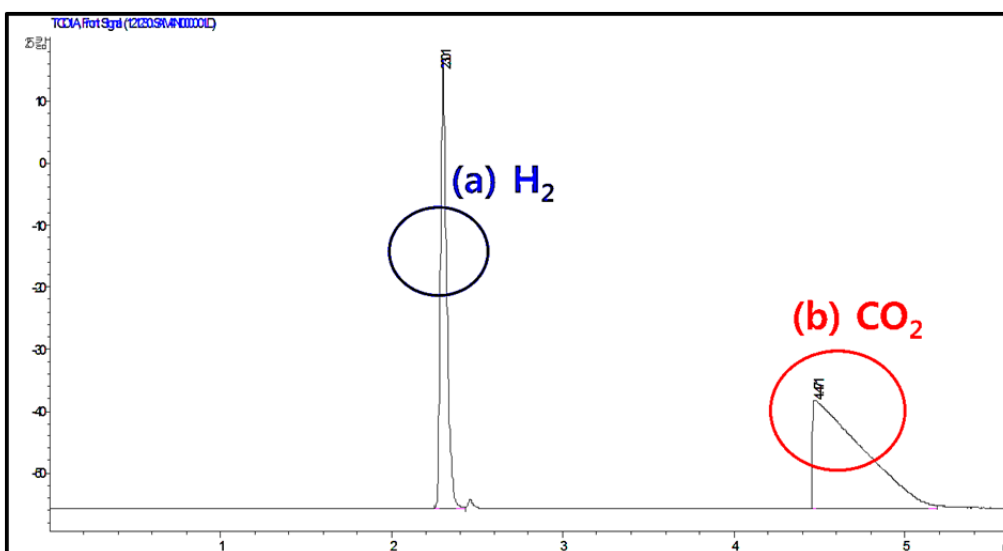

**Figure S4.** (i) HPLC product analysis results of liquid phase samples generated from electrochemical CO<sub>2</sub> reduction. H<sub>2</sub>O (a) and HCOOH (b) were observed with retention time of 4.86 and 9.19 respectively. (ii) Separation by GC-TCD detector at oven temperature of 35°C. H<sub>2</sub> (a) and unreacted CO<sub>2</sub> (b) were observed with retention time of 2.3 and 4.45 respectively.

**Table 1.** The weight of cathode electrodes before and after CO<sub>2</sub> electroreduction of 1 h, 2 h and 5 h respectively.

|          | <b>Before<br/>(mg)</b> | <b>After<br/>(mg)</b> | <b>Amount of Sn<br/>particle loss<br/>(mg)</b> | <b>Operating<br/>Time<br/>(h)</b> |
|----------|------------------------|-----------------------|------------------------------------------------|-----------------------------------|
| Sample 1 | 147.3                  | 145                   | 2.3                                            | 1                                 |
| Sample 2 | 144.1                  | 139.4                 | 4.7                                            | 2                                 |
| Sample 3 | 145.5                  | 137.2                 | 8.3                                            | 5                                 |
